# Supplementary material
Source: PubMed Central journal article supplement (PMC3151530)

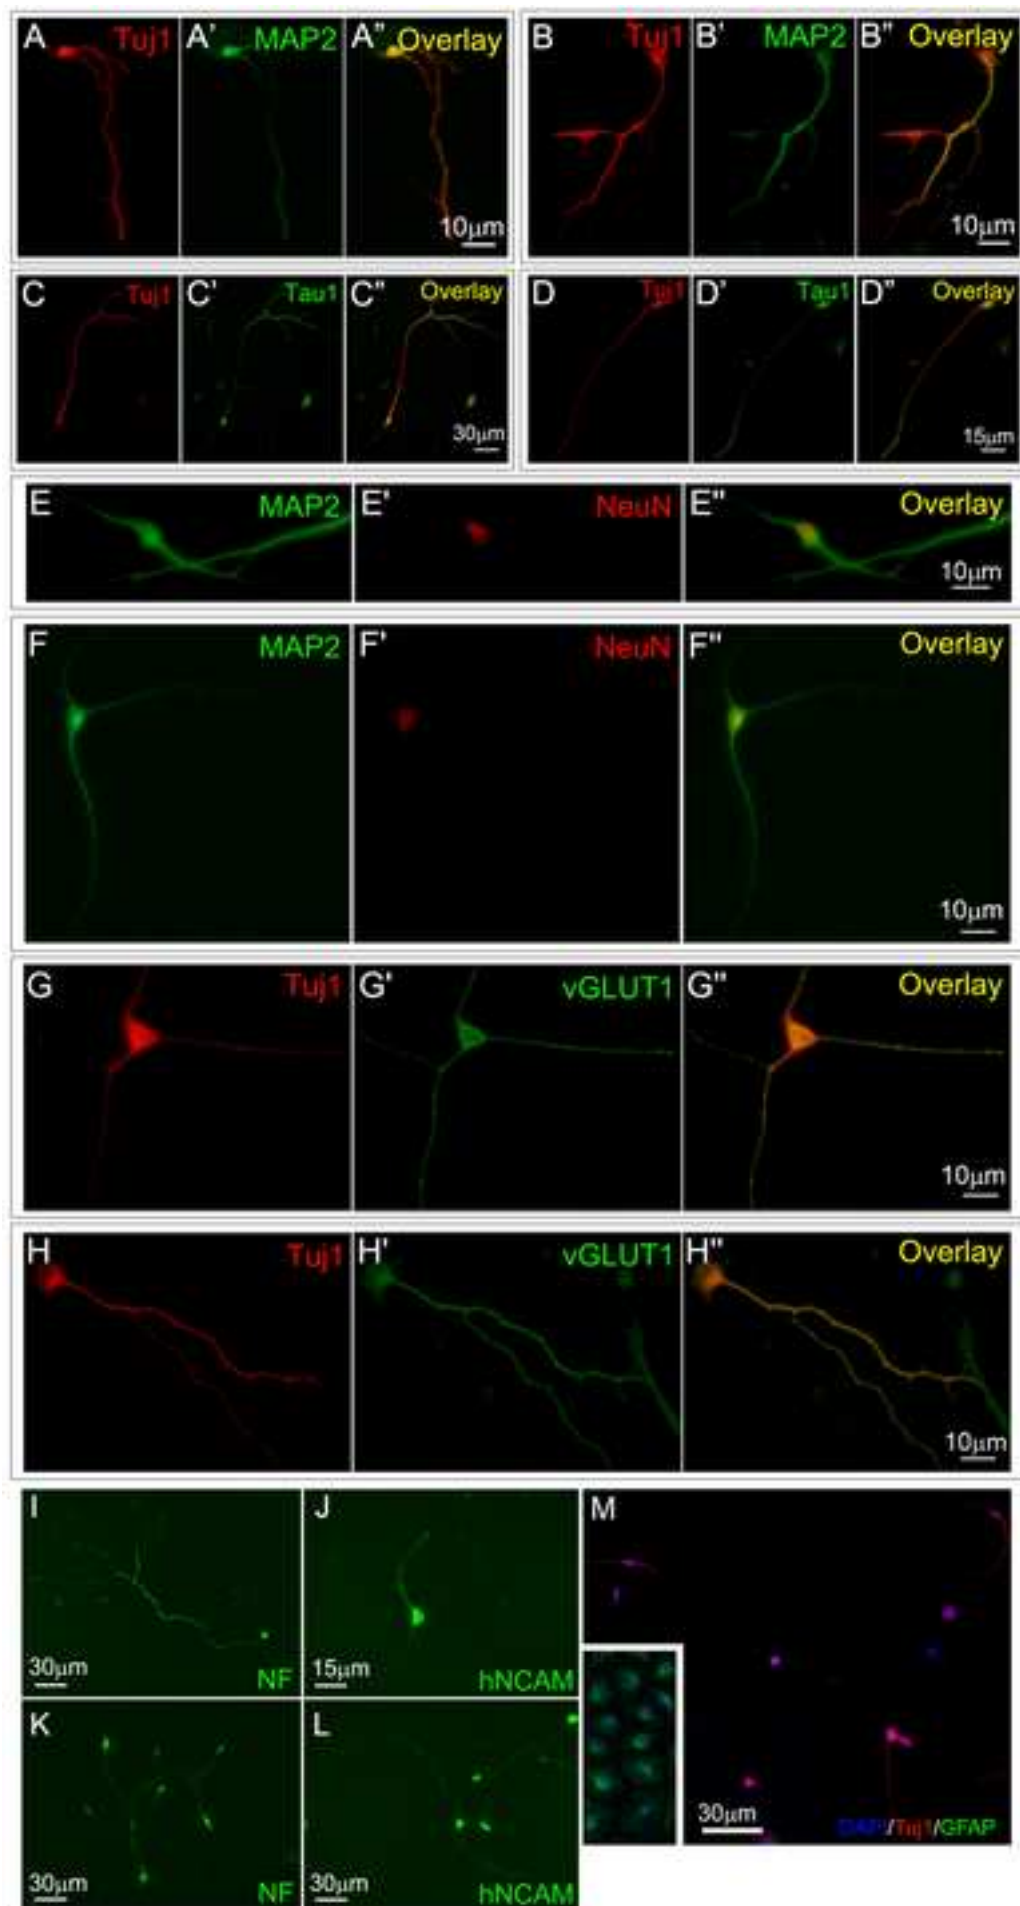

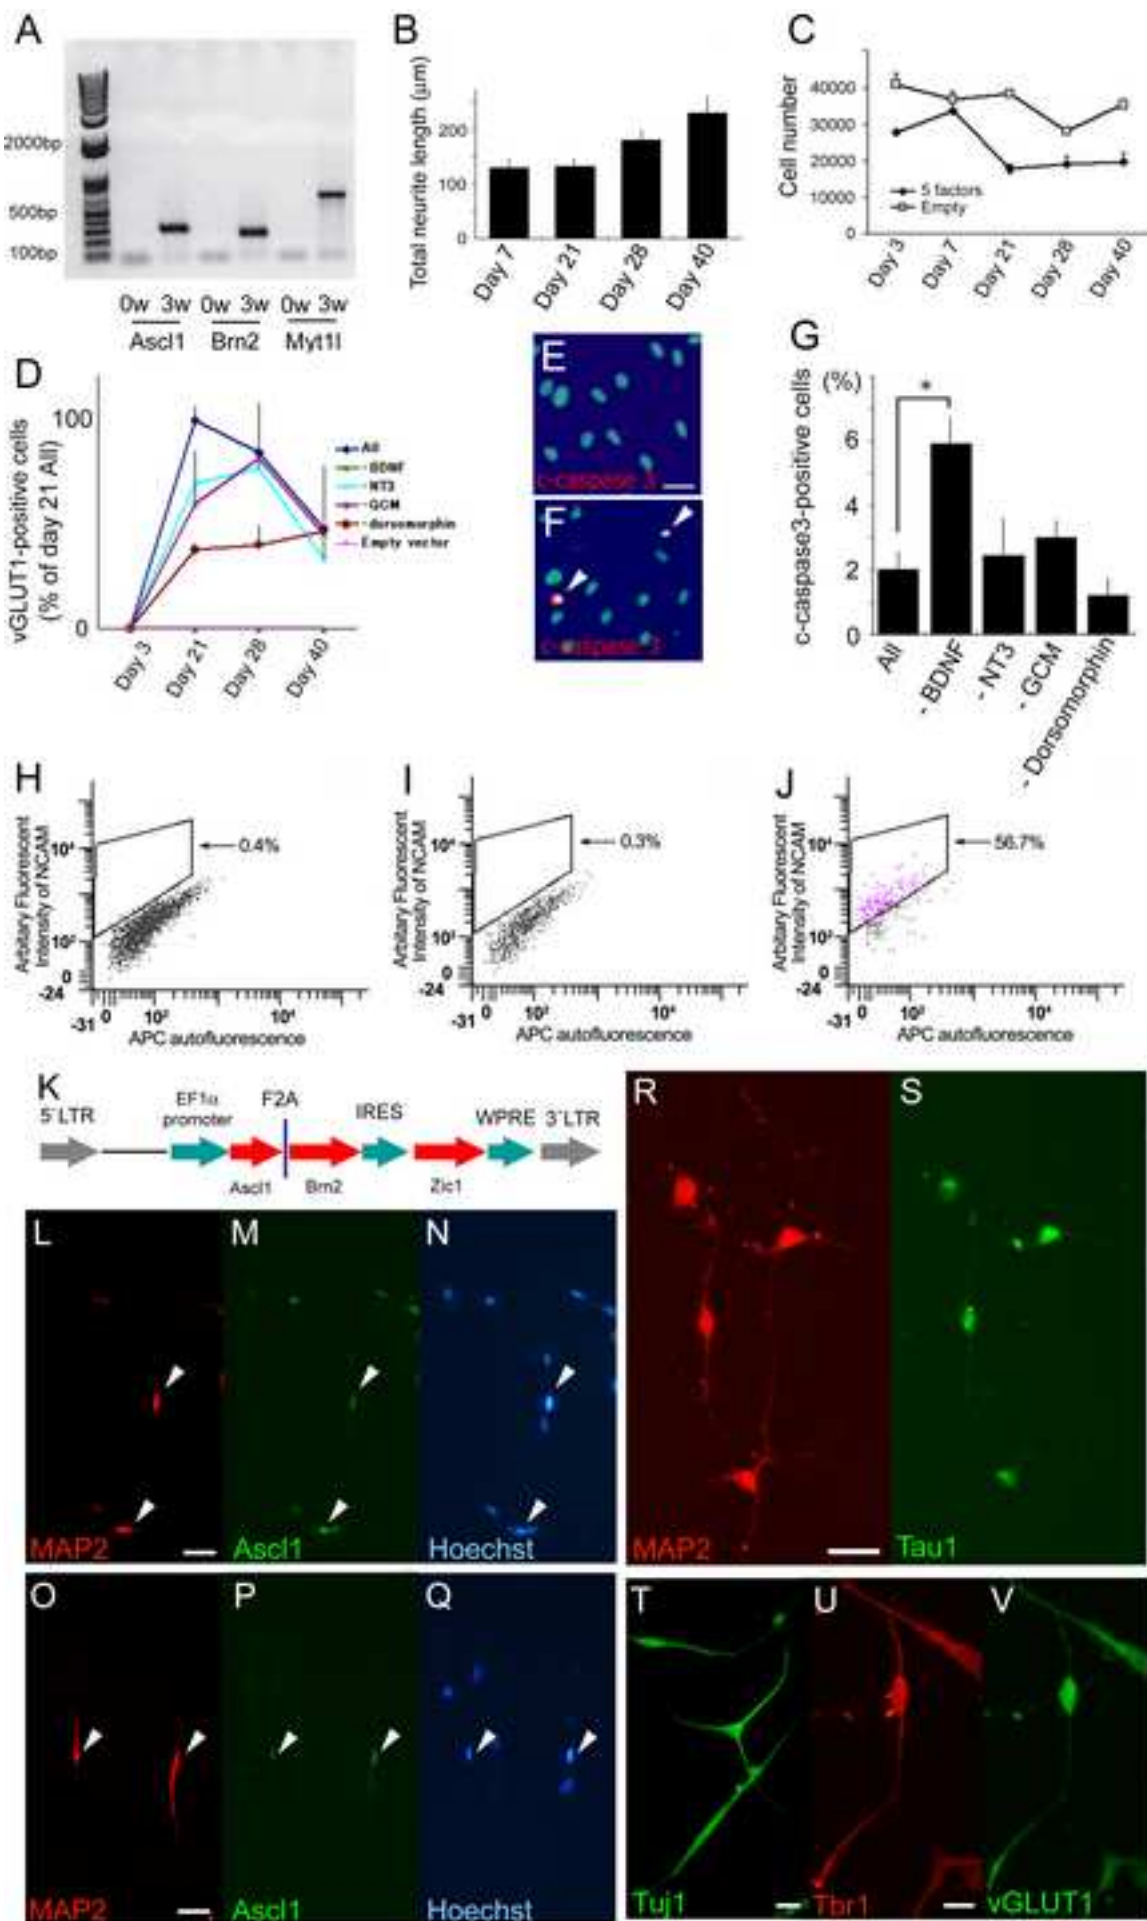

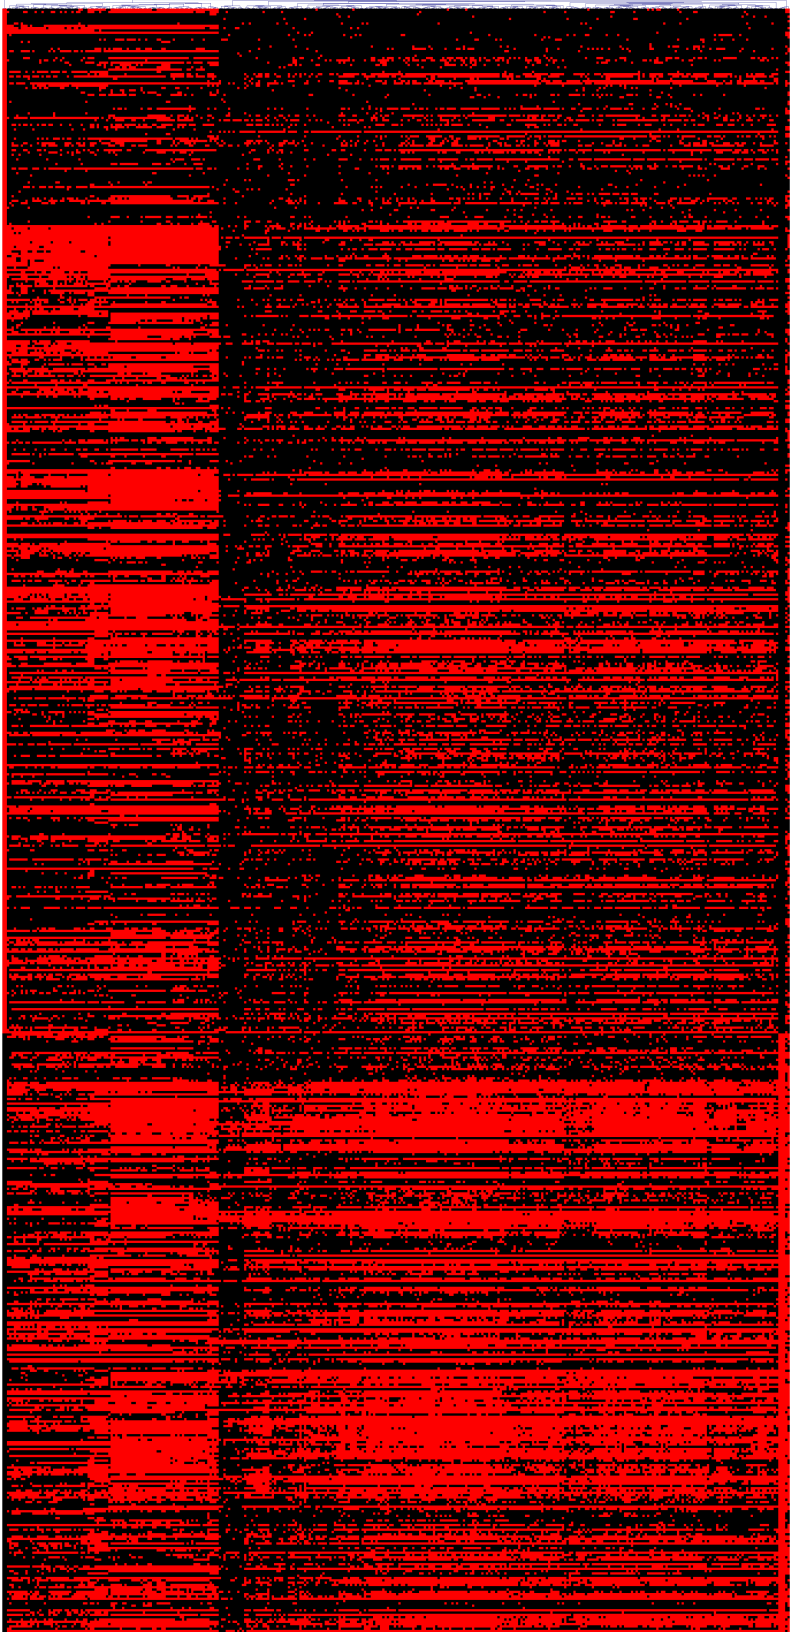

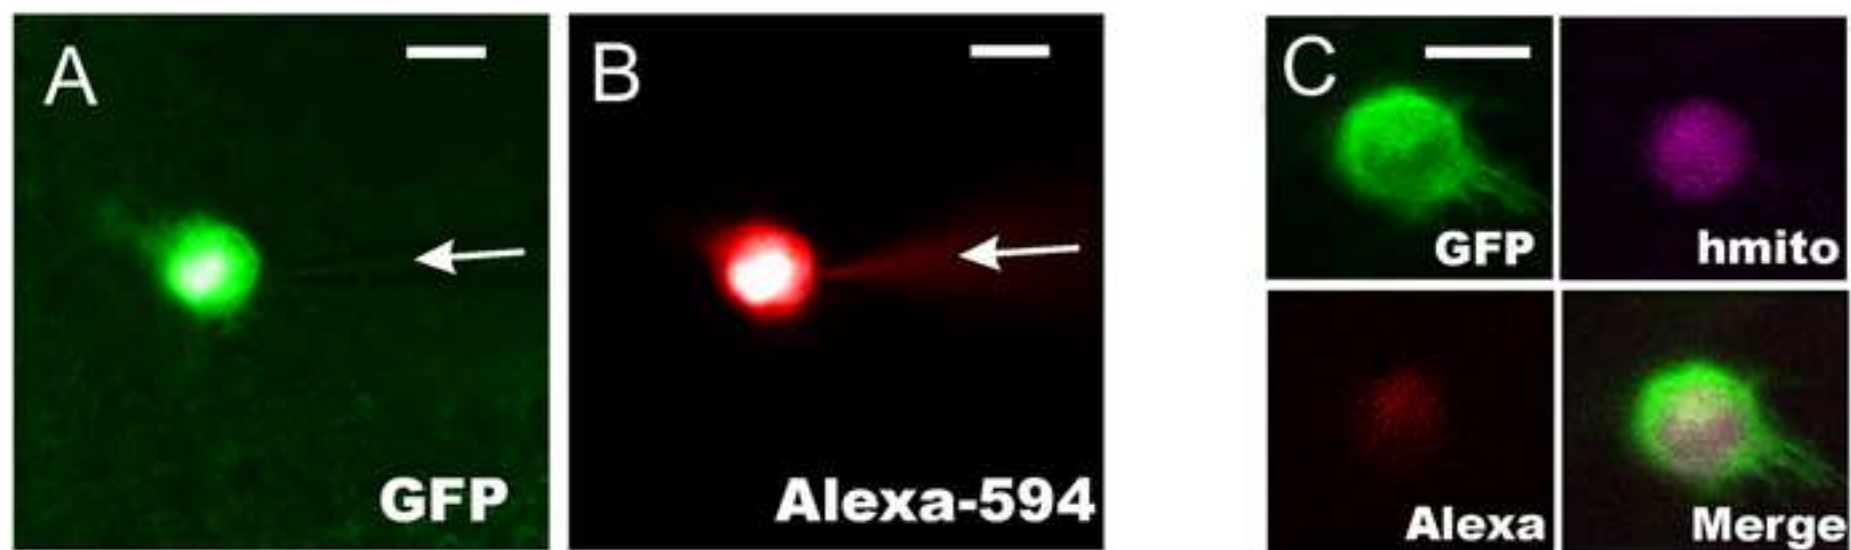

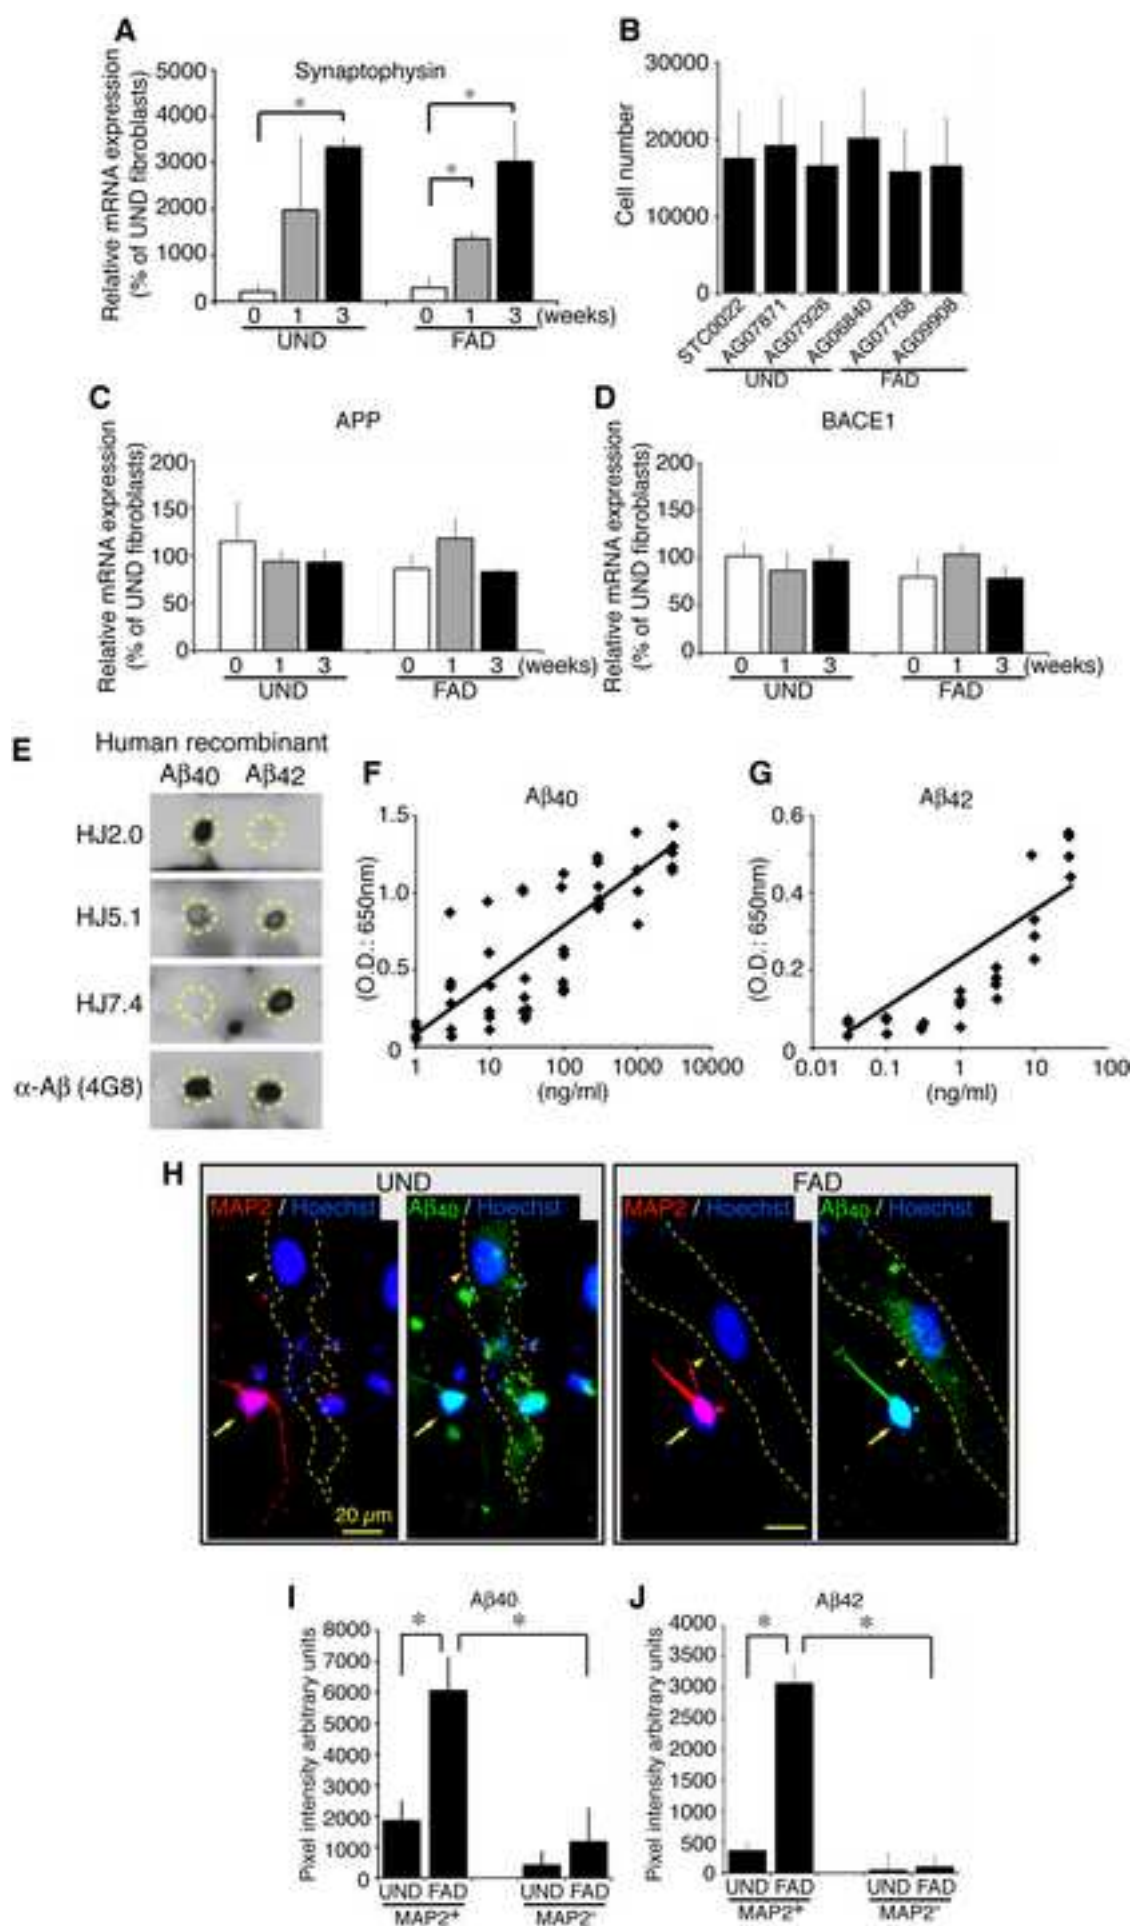



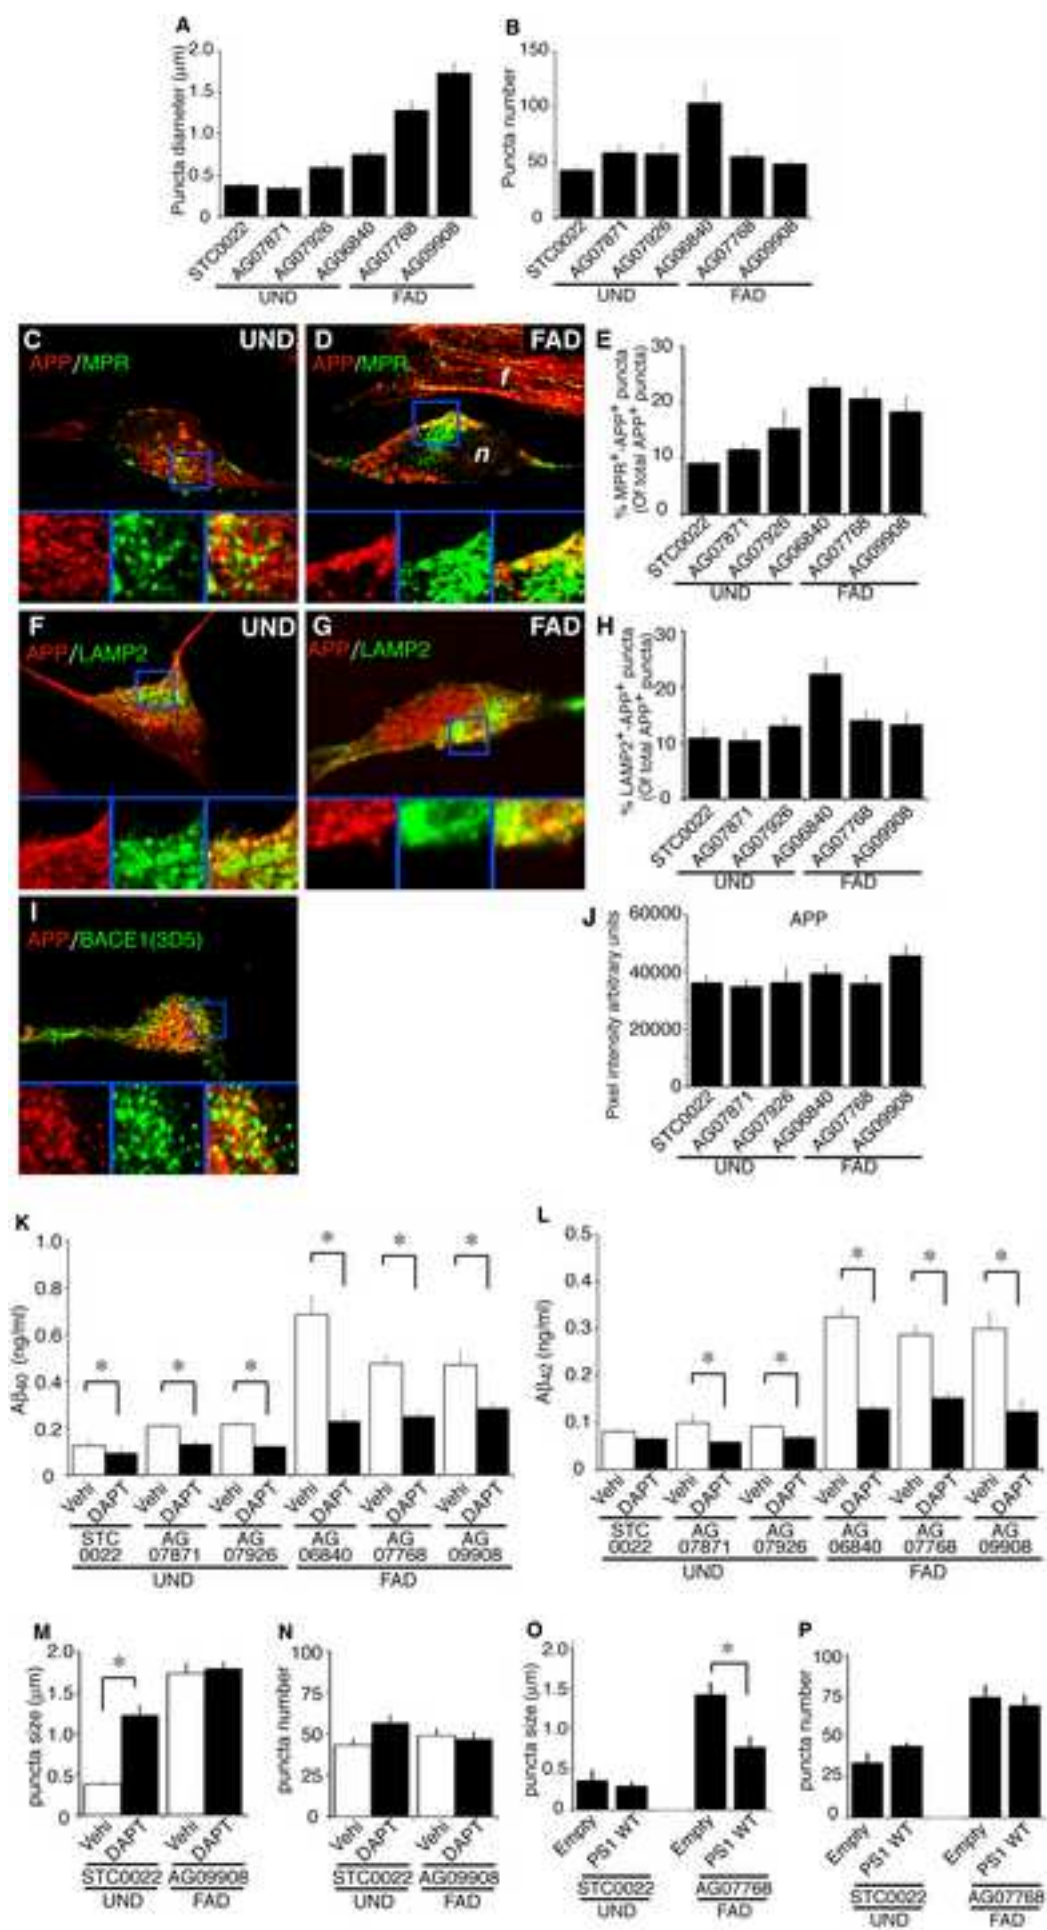

Supplement: NIHMS312205-supplement-02.pdf [file NIHMS312205-supplement-02.pdf]
